# Supplementary material for: Impact of surgical management of primary tumors in stage IV breast cancer patients: a retrospective observational study based on SEER database
Source: HighWire-hosted journal article supplement (doi:10.1136/bmjopen-2021-054135), 2022-02-01
Supplement: bmjopen-2021-054135supp002_data_supplement.pdf [file bmjopen-2021-054135supp002_data_supplement.pdf]

Table S1. Propensity score-matched patients' cohort (n=810).

| Covariates          | Levels                                  | Group                     |                                 | p-value |
|---------------------|-----------------------------------------|---------------------------|---------------------------------|---------|
|                     |                                         | Surgery Performed (n=405) | Recommended but refused (n=405) |         |
| Age at diagnosis*   |                                         | 65.9±14.5, 65 (56,77)     | 65.6±14.2, 65 (57,77)           | 0.75    |
| Year of diagnosis   | 2010                                    | 91 (22.2%)                | 91 (22.5%)                      | 0.98    |
|                     | 2011                                    | 79 (19.5%)                | 75 (18.5%)                      |         |
|                     | 2012                                    | 58 (14.3%)                | 61 (15.1%)                      |         |
|                     | 2013                                    | 68 (16.8%)                | 62 (15.3%)                      |         |
|                     | 2014                                    | 46 (11.4%)                | 52 (12.8%)                      |         |
|                     | 2015                                    | 64 (15.8%)                | 64 (15.8%)                      |         |
| Race                | white                                   | 308 (76.1%)               | 305 (75.3%)                     | 0.98    |
|                     | black                                   | 63 (15.6%)                | 64 (15.8%)                      |         |
|                     | other race                              | 33 (8.2%)                 | 35 (8.6%)                       |         |
|                     | Unknown                                 | 1 (0.3%)                  | 1 (0.3%)                        |         |
| T stage             | T0                                      | 6 (1.5%)                  | 5 (1.2%)                        | 0.89    |
|                     | T1                                      | 36 (8.9%)                 | 27 (6.7%)                       |         |
|                     | T2                                      | 100 (24.7%)               | 100 (24.7%)                     |         |
|                     | T3                                      | 56 (13.8%)                | 57 (14.1%)                      |         |
|                     | T4                                      | 139 (34.3%)               | 148 (36.5%)                     |         |
|                     | TX                                      | 68 (16.8%)                | 68 (16.8%)                      |         |
| N stage             | N0                                      | 117 (28.9%)               | 112 (27.7%)                     | 0.31    |
|                     | N1                                      | 180 (44.4%)               | 165 (40.7%)                     |         |
|                     | N2                                      | 28 (6.9%)                 | 44 (10.9%)                      |         |
|                     | N3                                      | 47 (11.6%)                | 44 (10.9%)                      |         |
|                     | NX                                      | 33 (8.2%)                 | 40 (9.9%)                       |         |
| Metastasis site     | Distant lymphnode mets only             | 47 (11.6%)                | 45 (11.1%)                      | 0.47    |
|                     | Bone Mets only                          | 145 (35.8%)               | 136 (33.6%)                     |         |
|                     | Visceral Mets only (One organ)          | 90 (22.2%)                | 95 (23.5%)                      |         |
|                     | Bone + Visceral Mets (One organ)        | 71 (17.5%)                | 71 (17.5%)                      |         |
|                     | Visceral Mets (≥2 organs) w/o Bone Mets | 52 (12.8%)                | 58 (14.3%)                      |         |
| Number of Met sites | 0                                       | 47 (11.6%)                | 45 (11.1%)                      | 0.93    |
|                     | 1                                       | 235 (58.0%)               | 231 (57.0%)                     |         |
|                     | 2                                       | 89 (22.0%)                | 88 (21.7%)                      |         |
|                     | 3                                       | 29 (7.2%)                 | 36 (8.9%)                       |         |
|                     | 4                                       | 5 (1.2%)                  | 5 (1.2%)                        |         |
| Her2/HR status      | HR+/HER2-                               | 199 (49.1%)               | 195 (48.2%)                     | 0.94    |
|                     | HR+/HER2+                               | 63 (15.6%)                | 57 (14.1%)                      |         |
|                     | HR-/HER2+                               | 31 (7.7%)                 | 31 (7.7%)                       |         |
|                     | TRIPLE NEGATIVE                         | 39 (9.6%)                 | 43 (10.6%)                      |         |
|                     | Unknown                                 | 73 (18.0%)                | 79 (19.5%)                      |         |
| Her2                | Negative                                | 240 (59.3%)               | 238 (58.8%)                     | 0.72    |
|                     | Positive                                | 94 (23.2%)                | 90 (22.2%)                      |         |
|                     | Borderline                              | 12 (3.0%)                 | 12 (3.0%)                       |         |
|                     | Unknown                                 | 59 (14.6%)                | 65 (16.1%)                      |         |
| ER                  | Negative                                | 76 (18.8%)                | 82 (20.3%)                      | 0.52    |
|                     | Positive                                | 287 (70.9%)               | 272 (67.2%)                     |         |
|                     | Borderline                              | 0 (0.0%)                  | 1 (0.3%)                        |         |
|                     | Unknown                                 | 42 (10.4%)                | 50 (12.4%)                      |         |
| PR                  | Negative                                | 127 (31.4%)               | 131 (32.4%)                     | 0.37    |
|                     | Positive                                | 234 (57.8%)               | 219 (54.1%)                     |         |
|                     | Borderline                              | 0 (0.0%)                  | 2 (0.5%)                        |         |
|                     | Unknown                                 | 44 (10.9%)                | 53 (13.1%)                      |         |
